# Supplementary material for: Development of a new electrochemical sensor for serotonin detection based on a manganese(iii) porphyrin complex
Source: Royal Society of Chemistry journal article supplement (doi:10.1039/d5ay01128k), 2025-01-01
Supplement: d5ay01128k1.pdf [file d5ay01128k1.pdf]

**Table 1.SI :** Analysis of the Raman spectrum of  $[\text{Mn}^{\text{III}}(\text{TTP})(\text{SO}_3\text{CF}_3)]$

| Groups                         | Band Position ( $\text{cm}^{-1}$ ) | Assignements         |
|--------------------------------|------------------------------------|----------------------|
| $\text{C}_\beta\text{C}_\beta$ | 1557                               | stretching vibration |
| Phenyl                         | 1367                               | stretching vibration |
| $\text{C}_\beta\text{-H}$      | 1082                               | bending deformation  |
| Pyrole + Phenyl                | 1029                               | stretching vibration |
| Phenyl                         | 713                                | stretching           |
| Mn-N                           | 392                                | stretching vibration |
